# Supplementary material for: The soil microbial food web revisited: Predatory myxobacteria as keystone taxa?
Source: PubMed Central journal article supplement (PMC8397742; doi:10.1038/s41396-021-00958-2), 2021-03-21

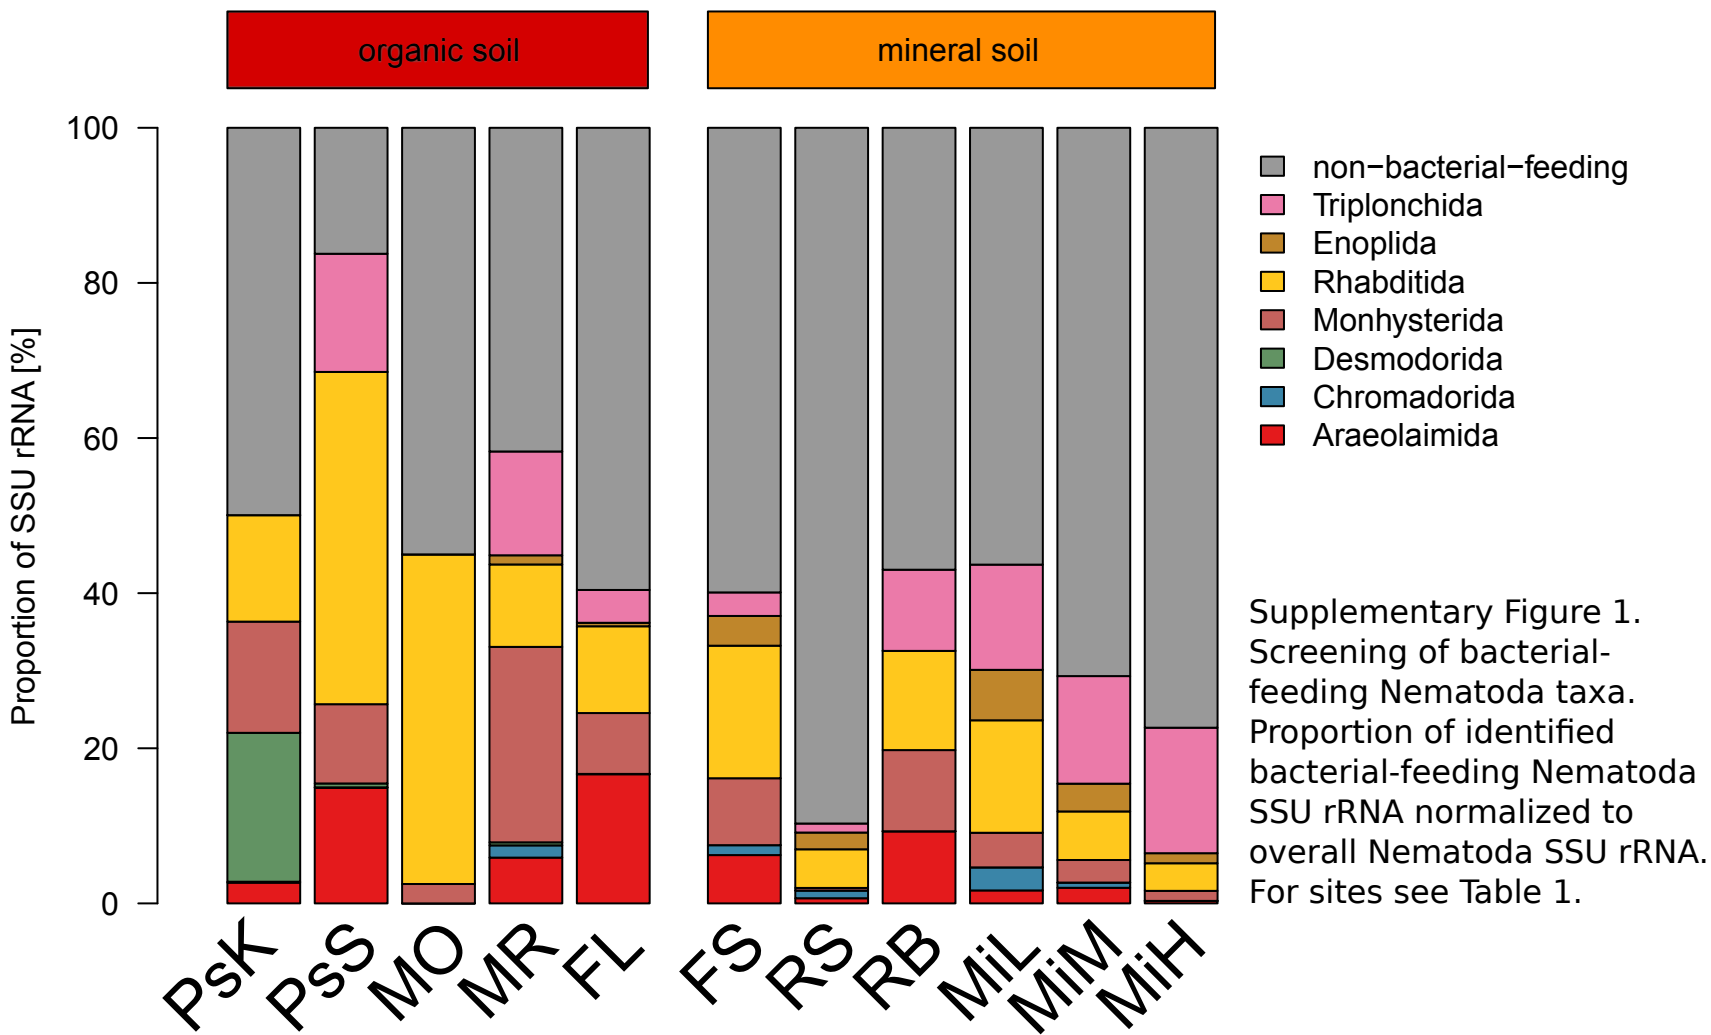

Supplement: 41396_2021_958_MOESM2_ESM.pdf [file 41396_2021_958_MOESM2_ESM.pdf]
